# Supplementary material for: Research on Closed-Loop Supply Chain with Competing Retailers under Government Reward-Penalty Mechanism and Asymmetric Information
Source: Hindawi journal article supplement (doi:10.1155/2020/7587453), 2020-03-23
Supplement: f1 [file 7587453.f1.pdf]

Appendix A is the results of the numerical analysis in section 8, which contains two parts.

Firstly, the Table 1 in Appendix A, we discuss the impact of carbon emission reward-penalty and recovery rate reward-penalty on the system decisions and members benefits with the retailers' competition coefficient is fixed ( $\varepsilon=0.5$ ). And the carbon emission reward-penalty intensity ranges from 0.2 to 2.6; the recovery rate reward-penalty intensity ranges from 0.05 to 0.3. Corresponding figure in the paper are Fig.4-Fig.7.

Secondly, based on the Table 2 in Appendix A, we mainly discuss the impact of competition among retailers on system decisions and members benefits under the fixed carbon emission reward-penalty intensity ( $f=2$ ). And the recovery rate reward-penalty intensity ranges from 0.05 to 0.3, the competition coefficient ranges from 0 to 1. Corresponding figure in the paper are Fig.8-Fig.12.

## Appendix A

**Table 1 the optimal decisions vs.  $f, k$  in CLSC when competition coefficient is fixed( $\varepsilon=0.5$ )**

| The competition coefficient is fixed( $\varepsilon=0.5$ ) |      |       |       |          |          |       |       |         |            |            |
|-----------------------------------------------------------|------|-------|-------|----------|----------|-------|-------|---------|------------|------------|
| $f$                                                       | $k$  | $w_H$ | $w_L$ | $\tau_H$ | $\tau_L$ | $p_1$ | $p_2$ | $\pi_M$ | $\pi_{R1}$ | $\pi_{R2}$ |
| 0.2                                                       | 0    | 3.90  | 1.40  | 0.53     | 0.38     | 9.26  | 9.28  | 21.59   | 21.71      | 17.43      |
|                                                           | 0.05 | 4.42  | 1.78  | 0.59     | 0.43     | 9.26  | 9.28  | 20.42   | 23.04      | 17.46      |
|                                                           | 0.10 | 4.92  | 2.15  | 0.66     | 0.48     | 9.26  | 9.28  | 18.97   | 24.56      | 17.48      |
|                                                           | 0.15 | 5.42  | 2.53  | 0.72     | 0.53     | 9.26  | 9.28  | 17.24   | 26.29      | 17.51      |
|                                                           | 0.20 | 5.92  | 2.90  | 0.79     | 0.58     | 9.26  | 9.28  | 15.24   | 28.19      | 17.54      |
|                                                           | 0.25 | 6.42  | 3.28  | 0.85     | 0.64     | 9.26  | 9.28  | 12.95   | 30.24      | 17.56      |
|                                                           | 0.30 | 6.92  | 3.65  | 0.92     | 0.70     | 9.26  | 9.28  | 10.37   | 32.48      | 17.59      |
| 0.6                                                       | 0    | 3.80  | 1.20  | 0.51     | 0.32     | 9.26  | 9.28  | 21.42   | 21.38      | 17.42      |
|                                                           | 0.05 | 4.26  | 1.58  | 0.57     | 0.37     | 9.26  | 9.28  | 20.38   | 22.64      | 17.45      |
|                                                           | 0.10 | 4.76  | 1.95  | 0.64     | 0.42     | 9.26  | 9.28  | 19.08   | 24.09      | 17.48      |
|                                                           | 0.15 | 5.26  | 2.33  | 0.70     | 0.47     | 9.26  | 9.28  | 17.49   | 25.74      | 17.50      |
|                                                           | 0.20 | 5.76  | 2.70  | 0.77     | 0.52     | 9.26  | 9.28  | 15.62   | 27.57      | 17.53      |
|                                                           | 0.25 | 6.26  | 3.08  | 0.83     | 0.58     | 9.26  | 9.28  | 13.48   | 29.56      | 17.56      |
|                                                           | 0.30 | 6.76  | 3.45  | 0.90     | 0.64     | 9.26  | 9.28  | 11.05   | 31.73      | 17.58      |
| 1.0                                                       | 0    | 3.60  | 1.00  | 0.48     | 0.27     | 9.26  | 9.28  | 21.17   | 21.07      | 17.42      |
|                                                           | 0.05 | 4.10  | 1.38  | 0.55     | 0.32     | 9.26  | 9.28  | 20.28   | 22.26      | 17.44      |
|                                                           | 0.10 | 4.60  | 1.75  | 0.61     | 0.37     | 9.26  | 9.28  | 19.11   | 23.63      | 17.47      |
|                                                           | 0.15 | 5.10  | 2.13  | 0.68     | 0.42     | 9.26  | 9.28  | 17.66   | 25.21      | 17.50      |
|                                                           | 0.20 | 5.60  | 2.50  | 0.74     | 0.47     | 9.26  | 9.28  | 15.93   | 26.97      | 17.52      |
|                                                           | 0.25 | 6.10  | 2.88  | 0.81     | 0.53     | 9.26  | 9.28  | 13.94   | 28.89      | 17.55      |
|                                                           | 0.30 | 6.60  | 3.25  | 0.87     | 0.59     | 9.26  | 9.28  | 11.64   | 30.99      | 17.58      |
| 1.4                                                       | 0    | 3.4   | 0.8   | 0.46     | 0.22     | 9.27  | 9.29  | 20.85   | 20.77      | 17.41      |

|     |      |     |     |      |      |      |      |       |       |       |
|-----|------|-----|-----|------|------|------|------|-------|-------|-------|
|     | 0.05 | 3.9 | 1.2 | 0.53 | 0.27 | 9.27 | 9.28 | 20.09 | 21.88 | 17.44 |
|     | 0.10 | 4.4 | 1.6 | 0.59 | 0.32 | 9.27 | 9.28 | 19.06 | 23.19 | 17.46 |
|     | 0.15 | 4.9 | 1.9 | 0.66 | 0.37 | 9.26 | 9.28 | 17.75 | 24.69 | 17.49 |
|     | 0.20 | 5.4 | 2.3 | 0.72 | 0.42 | 9.26 | 9.28 | 16.16 | 26.38 | 17.52 |
|     | 0.25 | 5.9 | 2.7 | 0.79 | 0.48 | 9.26 | 9.28 | 14.31 | 28.23 | 17.54 |
|     | 0.30 | 6.4 | 3.1 | 0.85 | 0.54 | 9.26 | 9.28 | 12.16 | 30.27 | 17.57 |
| 1.8 | 0    | 3.3 | 0.6 | 0.44 | 0.16 | 9.27 | 9.29 | 20.45 | 20.48 | 17.40 |
|     | 0.05 | 3.8 | 1.0 | 0.51 | 0.21 | 9.27 | 9.29 | 19.83 | 21.53 | 17.43 |
|     | 0.10 | 4.3 | 1.4 | 0.57 | 0.26 | 9.27 | 9.29 | 18.94 | 22.76 | 17.46 |
|     | 0.15 | 4.8 | 1.7 | 0.64 | 0.31 | 9.27 | 9.29 | 17.77 | 24.19 | 17.48 |
|     | 0.20 | 5.3 | 2.1 | 0.70 | 0.36 | 9.27 | 9.29 | 16.32 | 25.80 | 17.51 |
|     | 0.25 | 5.8 | 2.5 | 0.77 | 0.42 | 9.27 | 9.29 | 14.61 | 27.59 | 17.54 |
| 2.2 | 0    | 3.1 | 0.4 | 0.42 | 0.11 | 9.27 | 9.29 | 19.98 | 20.21 | 17.40 |
|     | 0.05 | 3.6 | 0.8 | 0.48 | 0.16 | 9.27 | 9.29 | 19.50 | 21.18 | 17.42 |
|     | 0.10 | 4.1 | 1.2 | 0.55 | 0.21 | 9.27 | 9.29 | 18.74 | 22.34 | 17.45 |
|     | 0.15 | 4.6 | 1.5 | 0.62 | 0.26 | 9.27 | 9.29 | 17.71 | 23.70 | 17.48 |
|     | 0.20 | 5.1 | 1.9 | 0.68 | 0.31 | 9.27 | 9.29 | 16.40 | 25.24 | 17.50 |
|     | 0.25 | 5.6 | 2.3 | 0.75 | 0.37 | 9.27 | 9.29 | 14.83 | 26.96 | 17.53 |
| 2.6 | 0    | 3.0 | 0.2 | 0.40 | 0.05 | 9.27 | 9.29 | 19.43 | 19.95 | 17.39 |
|     | 0.05 | 3.5 | 0.6 | 0.46 | 0.10 | 9.27 | 9.29 | 19.09 | 20.85 | 17.41 |
|     | 0.10 | 4.0 | 1.0 | 0.53 | 0.15 | 9.27 | 9.29 | 18.47 | 21.94 | 17.44 |
|     | 0.15 | 4.5 | 1.3 | 0.59 | 0.20 | 9.27 | 9.29 | 17.57 | 23.23 | 17.47 |
|     | 0.20 | 5.0 | 1.7 | 0.66 | 0.25 | 9.27 | 9.29 | 16.40 | 24.69 | 17.49 |
|     | 0.25 | 5.5 | 2.1 | 0.72 | 0.31 | 9.27 | 9.29 | 14.98 | 26.35 | 17.52 |
|     | 0.30 | 6.0 | 2.5 | 0.79 | 0.38 | 9.27 | 9.29 | 13.27 | 28.18 | 17.55 |

**Table 2 the optimal decisions vs.  $\varepsilon, k$  in CLSC when the carbon emission reward-penalty intensity is fixed ( $f = 2$ )**

| The carbon emission reward-penalty intensity is fixed ( $f = 2$ ) |     |       |       |          |          |       |       |         |            |            |
|-------------------------------------------------------------------|-----|-------|-------|----------|----------|-------|-------|---------|------------|------------|
| $\varepsilon$                                                     | $k$ | $w_H$ | $w_L$ | $\tau_H$ | $\tau_L$ | $p_1$ | $p_2$ | $\pi_M$ | $\pi_{R1}$ | $\pi_{R2}$ |
| 0.1                                                               | 0   | 3     | 0.4   | 0.21     | 0.08     | 7.35  | 7.32  | 15.0    | 5.4        | 4.3        |
| 0.2                                                               |     | 3     | 0.4   | 0.24     | 0.10     | 7.74  | 7.73  | 16.6    | 7.7        | 6.4        |
| 0.3                                                               |     | 3     | 0.4   | 0.27     | 0.11     | 8.19  | 8.19  | 18.4    | 10.7       | 9.2        |
| 0.4                                                               |     | 3     | 0.4   | 0.30     | 0.12     | 8.70  | 8.70  | 20.4    | 14.6       | 12.7       |
| 0.5                                                               |     | 3     | 0.4   | 0.35     | 0.13     | 9.27  | 9.29  | 22.7    | 19.7       | 17.4       |
| 0.6                                                               |     | 3     | 0.4   | 0.39     | 0.15     | 9.93  | 9.96  | 25.4    | 26.5       | 23.6       |
| 0.7                                                               |     | 3     | 0.4   | 0.45     | 0.17     | 10.69 | 10.73 | 28.5    | 35.5       | 31.8       |
| 0.8                                                               |     | 3     | 0.4   | 0.51     | 0.19     | 11.57 | 11.63 | 32.2    | 47.6       | 42.8       |

|     |      |     |      |      |      |       |       |      |      |      |
|-----|------|-----|------|------|------|-------|-------|------|------|------|
| 0.9 |      | 3   | 0.4  | 0.58 | 0.22 | 12.63 | 12.70 | 36.7 | 64.3 | 57.9 |
| 0.1 | 0.05 | 3.1 | 0.48 | 0.22 | 0.10 | 7.35  | 7.32  | 15.1 | 5.4  | 4.4  |
| 0.2 |      | 3.2 | 0.55 | 0.25 | 0.11 | 7.74  | 7.73  | 16.6 | 7.8  | 6.5  |
| 0.3 |      | 3.3 | 0.63 | 0.29 | 0.13 | 8.19  | 8.19  | 18.3 | 10.9 | 9.2  |
| 0.4 |      | 3.4 | 0.70 | 0.33 | 0.15 | 8.69  | 8.70  | 20.2 | 15.0 | 12.8 |
| 0.5 |      | 3.5 | 0.78 | 0.38 | 0.17 | 9.27  | 9.29  | 22.3 | 20.4 | 17.4 |
| 0.6 |      | 3.6 | 0.85 | 0.43 | 0.19 | 9.93  | 9.96  | 24.7 | 27.5 | 23.6 |
| 0.7 |      | 3.7 | 0.93 | 0.49 | 0.22 | 10.69 | 10.73 | 27.4 | 37.0 | 31.8 |
| 0.8 |      | 3.8 | 1.00 | 0.56 | 0.25 | 11.57 | 11.63 | 30.5 | 49.9 | 42.8 |
| 0.9 |      | 3.9 | 1.08 | 0.64 | 0.28 | 12.63 | 12.70 | 34.0 | 67.5 | 57.9 |
| 0.1 |      | 0.1 | 3.2  | 0.55 | 0.23 | 0.11  | 7.34  | 7.32 | 15.1 | 5.4  |
| 0.2 | 3.4  |     | 0.70 | 0.27 | 0.13 | 7.74  | 7.73  | 16.5 | 7.9  | 6.5  |
| 0.3 | 3.6  |     | 0.85 | 0.31 | 0.15 | 8.19  | 8.19  | 18.1 | 11.2 | 9.2  |
| 0.4 | 3.8  |     | 1.00 | 0.36 | 0.17 | 8.69  | 8.70  | 19.9 | 15.5 | 12.8 |
| 0.5 | 4.0  |     | 1.15 | 0.41 | 0.20 | 9.27  | 9.29  | 21.7 | 21.2 | 17.5 |
| 0.6 | 4.2  |     | 1.30 | 0.47 | 0.23 | 9.92  | 9.96  | 23.7 | 28.8 | 23.6 |
| 0.7 | 4.4  |     | 1.45 | 0.54 | 0.26 | 10.68 | 10.73 | 25.9 | 39.0 | 31.8 |
| 0.8 | 4.6  |     | 1.60 | 0.62 | 0.30 | 11.57 | 11.63 | 28.2 | 52.8 | 42.8 |
| 0.9 | 4.8  |     | 1.75 | 0.70 | 0.34 | 12.63 | 12.70 | 30.6 | 71.8 | 57.9 |
| 0.1 | 0.15 |     | 3.3  | 0.63 | 0.24 | 0.12  | 7.34  | 7.32 | 15.1 | 5.5  |
| 0.2 |      | 3.6 | 0.85 | 0.29 | 0.14 | 7.74  | 7.73  | 16.5 | 8.1  | 6.5  |
| 0.3 |      | 3.9 | 1.08 | 0.33 | 0.17 | 8.19  | 8.19  | 17.9 | 11.5 | 9.2  |
| 0.4 |      | 4.2 | 1.30 | 0.39 | 0.20 | 8.69  | 8.70  | 19.4 | 16.1 | 12.8 |
| 0.5 |      | 4.5 | 1.53 | 0.45 | 0.23 | 9.27  | 9.29  | 21.0 | 22.2 | 17.5 |
| 0.6 |      | 4.8 | 1.75 | 0.51 | 0.27 | 9.92  | 9.96  | 22.5 | 30.3 | 23.6 |
| 0.7 |      | 5.1 | 1.98 | 0.59 | 0.31 | 10.68 | 10.73 | 24.0 | 41.3 | 31.8 |
| 0.8 |      | 5.4 | 2.20 | 0.67 | 0.35 | 11.57 | 11.63 | 25.3 | 56.2 | 42.9 |
| 0.9 |      | 5.7 | 2.43 | 0.76 | 0.40 | 12.63 | 12.70 | 26.2 | 76.8 | 58.0 |
| 0.1 |      | 0.2 | 3.4  | 0.70 | 0.26 | 0.14  | 7.34  | 7.32 | 15.1 | 5.6  |
| 0.2 | 3.8  |     | 1.00 | 0.30 | 0.16 | 7.74  | 7.73  | 16.3 | 8.3  | 6.5  |
| 0.3 | 4.2  |     | 1.30 | 0.36 | 0.19 | 8.19  | 8.19  | 17.7 | 11.9 | 9.3  |
| 0.4 | 4.6  |     | 1.60 | 0.41 | 0.22 | 8.69  | 8.70  | 18.9 | 16.8 | 12.8 |
| 0.5 | 5.0  |     | 1.90 | 0.48 | 0.26 | 9.27  | 9.29  | 20.1 | 23.3 | 17.5 |
| 0.6 | 5.4  |     | 2.20 | 0.55 | 0.31 | 9.92  | 9.96  | 21.1 | 32.1 | 23.7 |
| 0.7 | 5.8  |     | 2.50 | 0.63 | 0.35 | 10.68 | 10.73 | 21.7 | 43.9 | 31.9 |
| 0.8 | 6.2  |     | 2.80 | 0.72 | 0.40 | 11.57 | 11.63 | 21.8 | 60.1 | 42.9 |
| 0.9 | 6.6  |     | 3.10 | 0.83 | 0.46 | 12.63 | 12.70 | 21.1 | 82.6 | 58.0 |
| 0.1 | 0.25 |     | 3.5  | 0.78 | 0.27 | 0.15  | 7.34  | 7.32 | 15.0 | 5.6  |
| 0.2 |      | 4.0 | 1.15 | 0.32 | 0.18 | 7.74  | 7.73  | 16.2 | 8.5  | 6.6  |
| 0.3 |      | 4.5 | 1.53 | 0.38 | 0.21 | 8.19  | 8.19  | 17.3 | 12.3 | 9.3  |

|     |      |     |      |      |      |       |       |      |      |      |
|-----|------|-----|------|------|------|-------|-------|------|------|------|
| 0.4 |      | 5.0 | 1.90 | 0.44 | 0.25 | 8.69  | 8.70  | 18.3 | 17.5 | 12.9 |
| 0.5 |      | 5.5 | 2.28 | 0.51 | 0.30 | 9.27  | 9.29  | 19.0 | 24.5 | 17.5 |
| 0.6 |      | 6.0 | 2.65 | 0.59 | 0.34 | 9.92  | 9.96  | 19.4 | 34.0 | 23.7 |
| 0.7 |      | 6.5 | 3.03 | 0.68 | 0.40 | 10.68 | 10.73 | 19.1 | 46.9 | 31.9 |
| 0.8 |      | 7.0 | 3.40 | 0.78 | 0.45 | 11.57 | 11.63 | 17.8 | 64.6 | 42.9 |
| 0.9 |      | 7.5 | 3.78 | 0.89 | 0.52 | 12.63 | 12.70 | 15.1 | 89.1 | 58.0 |
| 0.1 | 0.30 | 3.6 | 0.85 | 0.28 | 0.16 | 7.34  | 7.32  | 13.6 | 5.7  | 4.5  |
| 0.2 |      | 4.2 | 1.30 | 0.34 | 0.19 | 7.74  | 7.73  | 14.5 | 8.7  | 6.6  |
| 0.3 |      | 4.8 | 1.75 | 0.40 | 0.23 | 8.19  | 8.19  | 15.1 | 12.8 | 9.3  |
| 0.4 |      | 5.4 | 2.20 | 0.47 | 0.28 | 8.69  | 8.70  | 15.5 | 18.3 | 12.9 |
| 0.5 |      | 6.0 | 2.65 | 0.55 | 0.33 | 9.27  | 9.29  | 15.5 | 25.9 | 17.6 |
| 0.6 |      | 6.6 | 3.10 | 0.63 | 0.38 | 9.92  | 9.95  | 14.7 | 36.2 | 23.7 |
| 0.7 |      | 7.2 | 3.55 | 0.72 | 0.44 | 10.68 | 10.73 | 12.9 | 50.2 | 31.9 |
| 0.8 |      | 7.8 | 4.00 | 0.83 | 0.51 | 11.57 | 11.63 | 9.6  | 69.5 | 43.0 |
| 0.9 |      | 8.4 | 4.45 | 0.95 | 0.58 | 12.63 | 12.70 | 4.2  | 96.3 | 58.1 |
